# Supplementary material for: Targeting STING oligomerization with small-molecule inhibitors
Source: PubMed Central journal article supplement — Proc Natl Acad Sci U S A. 2023 Aug 7;120(33):e2305420120. doi: 10.1073/pnas.2305420120 (PMC10434303; doi:10.1073/pnas.2305420120), 2023-08-07
Supplement: pnas.2305420120.sapp.pdf [file pnas.2305420120.sapp.pdf]

## Supporting Information for Targeting STING oligomerization with small-molecule inhibitors

Fiachra Humphries<sup>1,6\*</sup>, Liraz Shmuel-Galia<sup>1,6</sup>, Zhaozhao Jiang<sup>1</sup>, Jeffrey Y. Zhou<sup>1</sup>, Leonard Barasa<sup>2</sup>, Santanu Mondal<sup>2,3</sup>, Ruth Wilson<sup>1</sup>, Nadia Sultana<sup>2,4</sup>, Scott A Shaffer<sup>2,4</sup>, Sze-Ling Ng<sup>5</sup>, G. Scott Pesiridis<sup>5</sup>, Paul R. Thompson<sup>2,\*</sup> and Katherine A. Fitzgerald<sup>1,\*</sup>

\*Correspondence to: [Fiachra.Humphries@umassmed.edu](mailto:Fiachra.Humphries@umassmed.edu)  
[Paul.Thompson@umassmed.edu](mailto:Paul.Thompson@umassmed.edu)  
[Kate.Fitzgerald@umassmed.edu](mailto:Kate.Fitzgerald@umassmed.edu)

**This PDF file includes:**

Figures S1 to S4

**A****BB-CI-Yne**

sp|Q3TBT3|STING\_MOUSE (100%), 42,831.5 Da  
 sp|Q3TBT3|STING\_MOUSE Stimulator of interferon genes protein OS=Mus musculus OX=10090 GN=Tmem173  
 6 exclusive unique peptides, 7 exclusive unique spectra, 7 total spectra, 89/378 amino acids (24% coverage)

|                    |                   |                    |                   |                   |
|--------------------|-------------------|--------------------|-------------------|-------------------|
| MPYSNLHPAI         | PRPRGHRSKY        | VALIFLVLASL        | MILWVAKDPP        | NHTLKYLALH        |
| LASHELGLLL         | KNLCCLAEEL        | CHVOSRYOGS         | YWKAVRACLG        | CPIHCMAMIL        |
| LSSYFYFLON         | TADIYLSWMF        | GLLVLYKSLS         | MLLGLOSLTP        | AEVSAVCEEK        |
| KLNVAHGLAW         | SYIIGYLRLLI       | LPGLQARIRM         | FNOLHNNMLS        | GAGSRRLYIL        |
| <b>FPLDCGVPDN</b>  | <b>LSVVDPNIRF</b> | <b>RDMLPOONID</b>  | <b>RAGIKNRVYS</b> | <b>NSVYEILENG</b> |
| OPAGVCILEY         | ATPLOTLFAM        | SODAKAGFSR         | EDRLEOAKLF        | CRTLEEILED        |
| <b>VPESRNNCRLL</b> | <b>IYVOEPTDGN</b> | <b>SFSLSOEVLRL</b> | <b>HIRQEEKEEV</b> | <b>TMNAPMTSVA</b> |
| <b>PPPSVLSQEP</b>  | <b>RLLSGMDQP</b>  | <b>LPLRTDLI</b>    |                   |                   |

**B****BB-CI-Yne + BB-CI**

sp|Q3TBT3|STING\_MOUSE (100%), 42,831.5 Da  
 sp|Q3TBT3|STING\_MOUSE Stimulator of interferon genes protein OS=Mus musculus OX=10090 GN=Tmem173  
 1 exclusive unique peptides, 1 exclusive unique spectra, 1 total spectra, 10/378 amino acids (3% coverage)

|                    |                   |                    |                   |                   |
|--------------------|-------------------|--------------------|-------------------|-------------------|
| MPYSNLHPAI         | PRPRGHRSKY        | VALIFLVLASL        | MILWVAKDPP        | NHTLKYLALH        |
| LASHELGLLL         | KNLCCLAEEL        | CHVOSRYOGS         | YWKAVRACLG        | CPIHCMAMIL        |
| LSSYFYFLON         | TADIYLSWMF        | GLLVLYKSLS         | MLLGLOSLTP        | AEVSAVCEEK        |
| KLNVAHGLAW         | SYIIGYLRLLI       | LPGLQARIRM         | FNOLHNNMLS        | GAGSRRLYIL        |
| <b>FPLDCGVPDN</b>  | <b>LSVVDPNIRF</b> | <b>RDMLPOONID</b>  | <b>RAGIKNRVYS</b> | <b>NSVYEILENG</b> |
| OPAGVCILEY         | ATPLOTLFAM        | SODAKAGFSR         | EDRLEOAKLF        | CRTLEEILED        |
| <b>VPESRNNCRLL</b> | <b>IYVOEPTDGN</b> | <b>SFSLSOEVLRL</b> | <b>HIRQEEKEEV</b> | <b>TMNAPMTSVA</b> |
| <b>PPPSVLSQEP</b>  | <b>RLLSGMDQP</b>  | <b>LPLRTDLI</b>    |                   |                   |

**Supplementary Figure 1. BB-CI-amidine binds to STING. (A–B)** Sequence coverage of STING from analysis of peptides identified in streptavidin bead pull-downs from clicked lysates of BMDMs treated with BB-CI-Yne (A) or BMDMs co-treated with BB-CI-amidine and BB-CI-Yne (B) (related to Figure 4). Representative of 3 independent replicates.

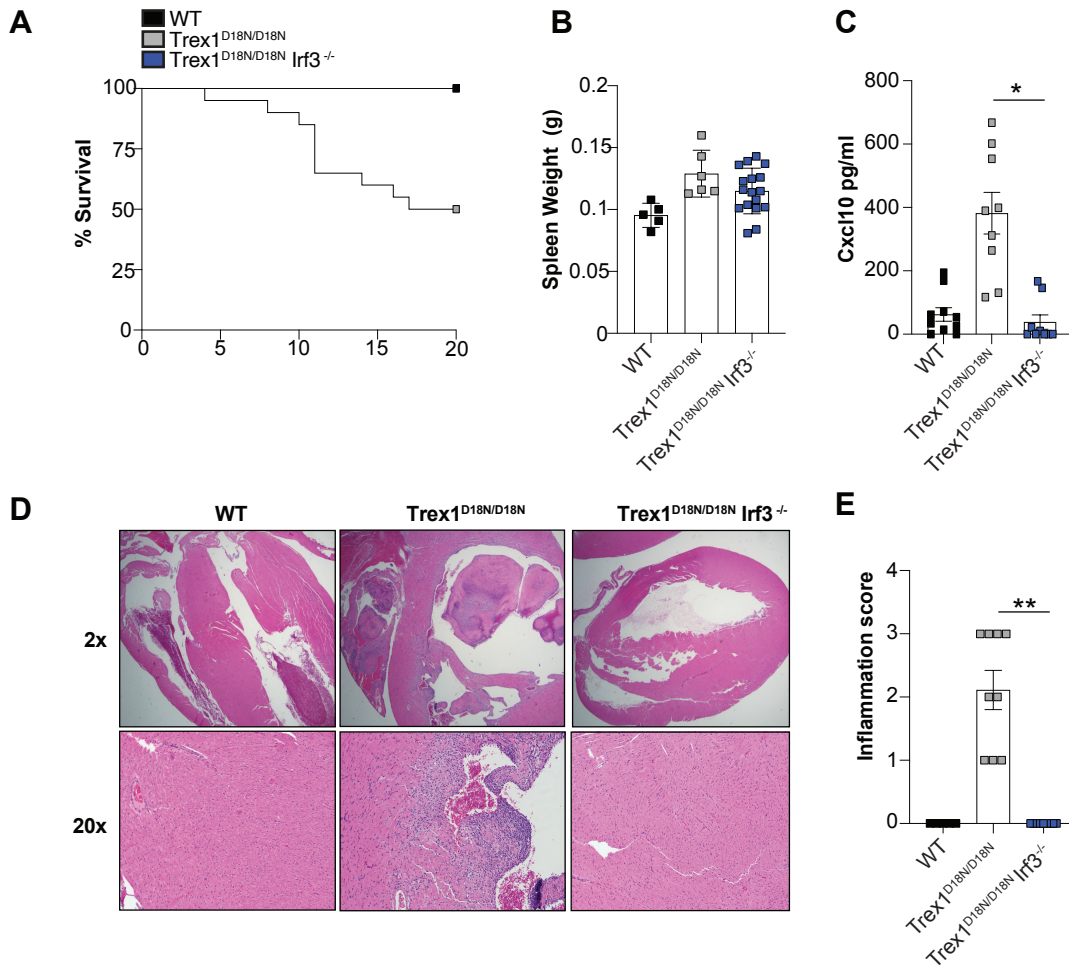

**Supplementary Figure 2. IRF3 deficiency protects against experimental AGS in *Trex1<sup>D18N/D18N</sup>* mice.** (A) Survival analysis of WT (n=20), *Trex1<sup>D18N/D18N</sup>* (n=20), *Trex1<sup>D18N/D18N</sup>/Irf3<sup>-/-</sup>* mice (n=20). (B) Spleen weights of WT (n=5), *Trex1<sup>D18N/D18N</sup>* (n=6), *Trex1<sup>D18N/D18N</sup>/Irf3<sup>-/-</sup>* mice (n=17) (C) ELISA analysis of serum Cxcl10 in WT (n=10), *Trex1<sup>D18N/D18N</sup>* (n=9), *Trex1<sup>D18N/D18N</sup>/Irf3<sup>-/-</sup>* mice (n=9). (D–E) Representative H&E staining of tissue sections from hearts (D) and pathology evaluation of heart sections (E) from WT (n=5) and *Trex1<sup>D18N/D18N</sup>* (n=9) and *Trex1<sup>D18N/D18N</sup>/Irf3<sup>-/-</sup>* mice (n=9). \*,  $P < 0.05$ , \*\*,  $P < 0.01$  by two-way ANOVA. Error bars show means  $\pm$  SEM.

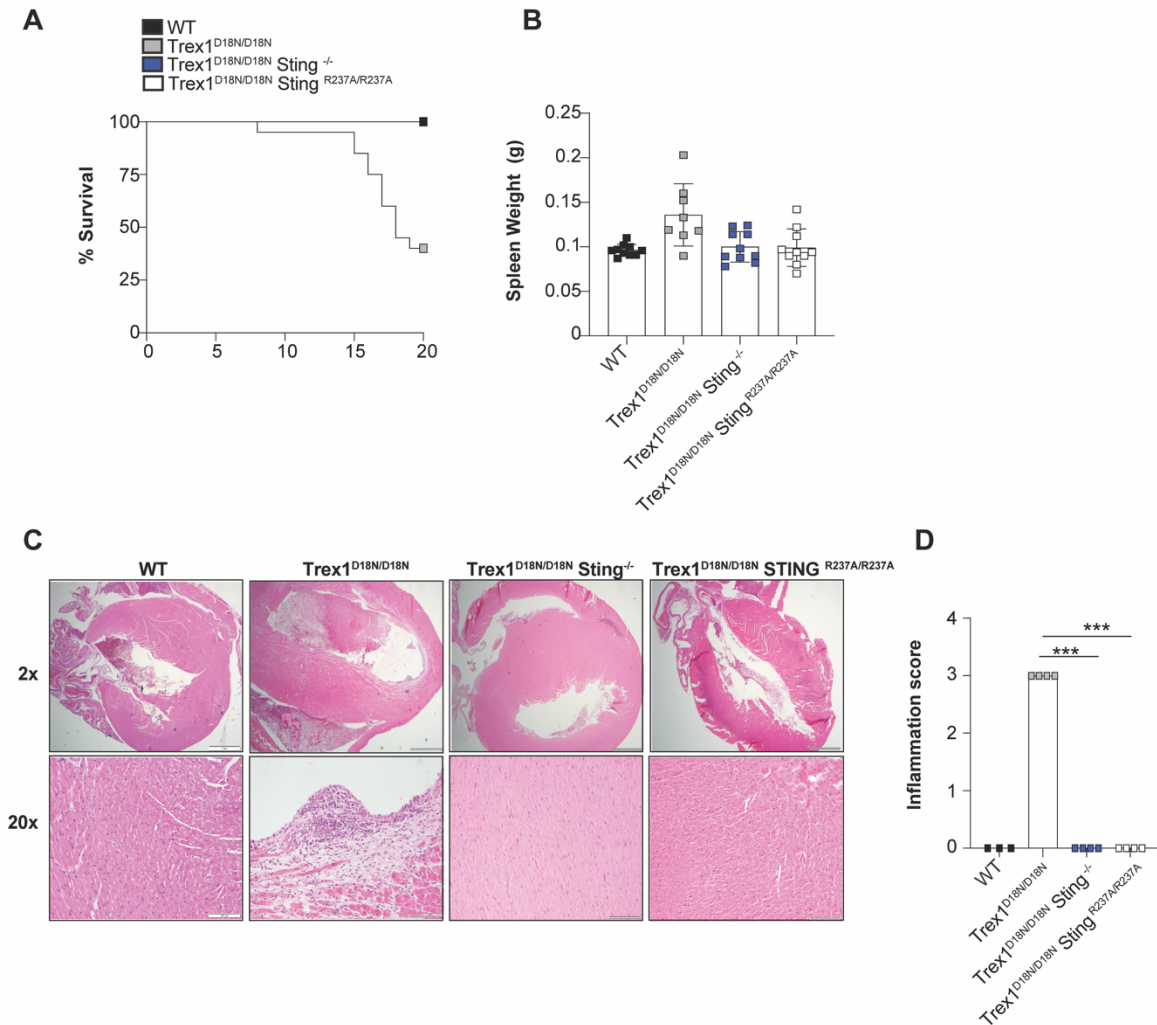

**Supplementary Figure 3. STING deficiency and cGAMP binding blockade protect against experimental AGS in *Trex1*<sup>D18N/D18N</sup> mice.** (A) Survival analysis of WT (n=10), *Trex1*<sup>D18N/D18N</sup> (n=20) and *Trex1*<sup>D18N/D18N</sup>/*STING*<sup>-/-</sup> (n=10) and *Trex1*<sup>D18N/D18N</sup>/*STING*<sup>R237A/R237A</sup> (n=10) mice. (B) Spleen weights of WT (n=10), *Trex1*<sup>D18N/D18N</sup> (n=8), *Trex1*<sup>D18N/D18N</sup>/*STING*<sup>-/-</sup> (n=10) and *Trex1*<sup>D18N/D18N</sup>/*STING*<sup>R237A/R237A</sup> (n=10) mice. (C–D) Representative H&E staining (C) and pathology scoring of tissue sections from hearts (D) of WT (n=3), *Trex1*<sup>D18N/D18N</sup> (n=4) and *Trex1*<sup>D18N/D18N</sup>/*STING*<sup>-/-</sup> (n=4) and *Trex1*<sup>D18N/D18N</sup>/*STING*<sup>R237A/R237A</sup> (n=4) mice., \*\*\*, *P*<0.001. two-way ANOVA. Error bars show means ± SEM.

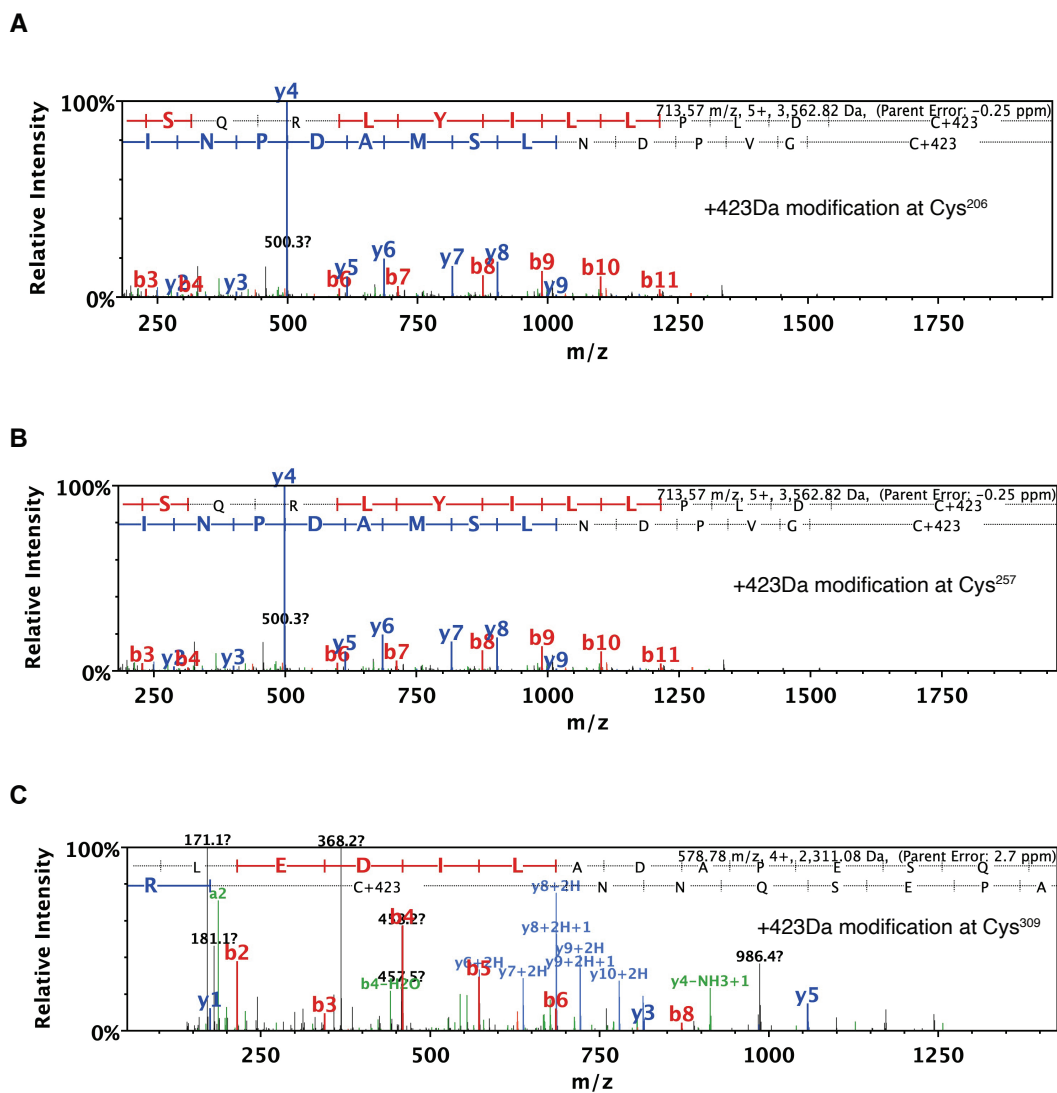

**Supplementary Figure 4. BB-Cl-amidine modifies Cys<sup>206</sup>, Cys<sup>257</sup> and Cys<sup>309</sup> in STING. (A–C)** Representative mass spectrometry spectra of STING modified by BB-Cl-amidine AT Cys<sup>206</sup> (A), Cys<sup>257</sup> (B) and Cys<sup>309</sup> (C) identified in tryptic digests from recombinant STING (10  $\mu$ g) incubated with BB-Cl-amidine (10  $\mu$ M) for 1 h at 37 °C.
